# Supplementary material for: Public Stigma and Self-Stigma: Differential Association With Attitudes Toward Formal and Informal Help Seeking
Source: Atypon-hosted journal article supplement (doi:10.1176/appi.ps.201200561), 2013-11-15
Supplement: 232_ds001.pdf [file 232_ds001.pdf]

## **Appendix**

*The depression vignette was as follows:*

Jan/Marie/Ahmed/Fatima is a Belgian/Turkish men/women. For the last several weeks NAME has been feeling really down. She/he wakes up in the morning with a sad mood and heavy feeling that stick with her/him all day long. She/he isn't enjoying things the way she/he normally would. In fact, nothing seems to give him/her pleasure. Even when good things happen, they don't seem to make NAME happy. The smallest tasks are difficult to accomplish. She/he finds it hard to concentrate on anything. She/he feels out of energy, out of steam and cannot do things she/he usually does. And even though NAME feels tired, when night comes she/he can't go to sleep. NAME feels pretty worthless, very discouraged and guilty. NAME's family has noticed that she/he has lost appetite and weight. She/he has pulled away from the and just doesn't feel like talking.

*The psychosis vignette was:*

Jan/Marie/Ahmed/Fatima is a Belgian/Turkish men/women. Up until a year ago, life was pretty okay for NAME. But then, things started to change. He thought that people around him/her were making disapproving comments, and talking behind his/her back. NAME was convinced that people were spying on him/her and that they could hear what she/he was thinking. NAME last his/her drive to participate in his/her usual work and family activities and retreated to his/her home, eventually spending most of his/her time on his/her own. NAME became so preoccupied with what she/he was thinking that she/he skipped meals and stopped bathing regularly. At night, when everyone else was sleeping, she/he was walking back and forth at home. NAME was hearing voices even though no one else was around. These voices told him/her what to do and what to think. She/he has been living this way for six months.
